# Supplementary material for: Melt-Processable Semicrystalline Polyimides Based on 1,4-Bis(3,4-dicarboxyphenoxy)benzene Dianhydride (HQDPA): Synthesis, Crystallization, and Melting Behavior
Source: MDPI journal article supplement (doi:10.3390/polym9090420), 2017-09-06
Supplement: s1 [file s1]

# Melt-Processable Semicrystalline Polyimides Based on 1,4-Bis(3,4-dicarboxyphenoxy)benzene Dianhydride (HQDPA): Synthesis, Crystallization and Melting Behavior

Hongfei Zhang<sup>1,2</sup>, Wei Wang<sup>1</sup>, Guofei Chen<sup>1</sup>, Anjiang Zhang<sup>1</sup>, Xingzhong Fang<sup>1\*</sup>

<sup>1</sup> Key Laboratory of Additive Manufacturing Materials of Zhejiang Province, Ningbo Institute of Material Technology and Engineering, Chinese Academy of Sciences, 1219 Zhongguan West Rd, Zhenhai District, Ningbo, Zhejiang, 315201, China.; fxzhong@nimte.ac.cn

<sup>2</sup> University of Chinese Academy of Sciences, 19 A Yuquan Rd, Shijingshan District, Beijing, 100049, China.; zhanghf@nimte.ac.cn

\* Correspondence: fxzhong@nimte.ac.cn; Tel.: +86-574-86685185

Supplementary Materials:

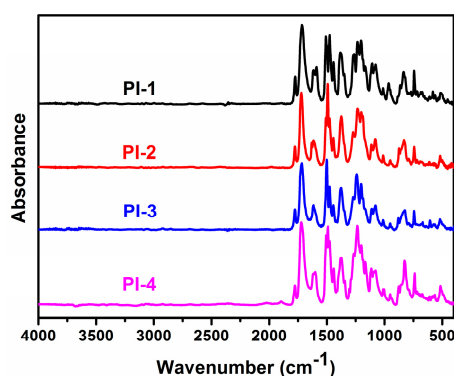

Figure S1. FTIR spectra of polyimides

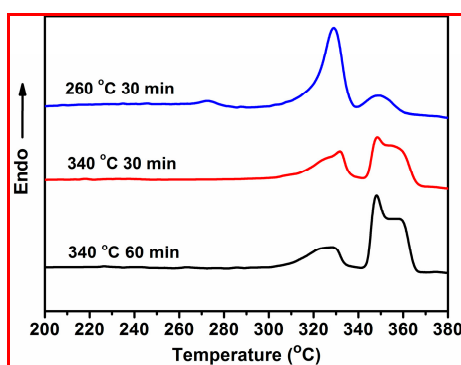

Figure S2. DSC curves of PI-1 after different isothermal treatment.

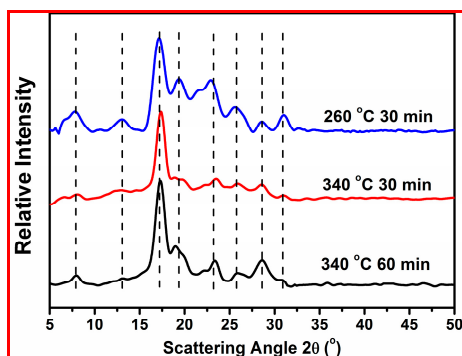

Figure S3. WAXD patterns of PI-1 after different isothermal treatment

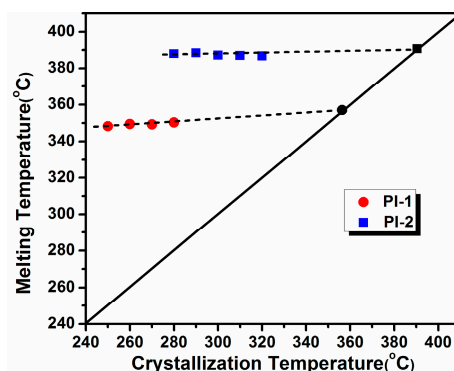

Figure S4. Hoffman-Weeks plot for PI-1 and PI-2.

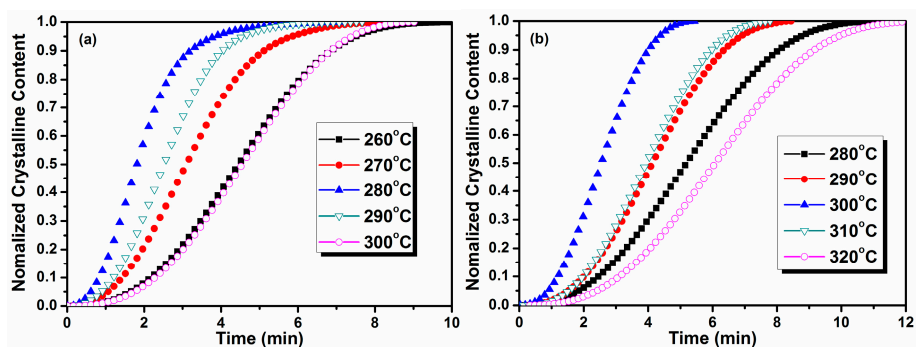

Figure S5. Normalized crystalline content as a function of time at various crystallization temperatures. (a) PI-1, (b) PI-2.

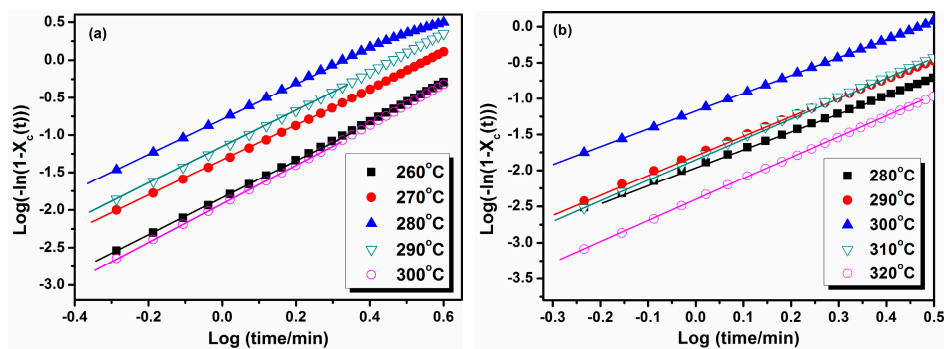

Figure S6. Avrami plot of  $\log [-\ln (1-X_c(t))]$  versus  $\log t$  at various crystallization temperatures. (a) PI-1, (b) PI-2.
